# Supplementary material
Source: PubMed Central journal article supplement (PMC2869083)
Supplement: NIHMS199260-supplement-01.pdf [file NIHMS199260-supplement-01.pdf]

## Supplementary Appendix

This appendix has been provided by the authors to give readers additional information about their work.

Supplement to: The INSIGHT-ESPRIT Study Group and SILCAAT Scientific Committee. Interleukin-2 therapy in patients with HIV infection. *N Engl J Med* 2009;361:1548-59.

## Design and Methods for SILCAAT and ESPRIT

### **CD4+ Goals**

#### SILCAAT

After the induction phase, additional cycles of IL-2 therapy were to be given in order to maintain the CD4+ cell count greater than a threshold of 175 cells above baseline for those with a baseline CD4+ count of 200 to 299 cells/mm<sup>3</sup> and 125 cells above baseline for those with a CD4+ count of 50-199 cells/mm<sup>3</sup> at study entry.

#### ESPRIT

After the induction phase, additional cycles of IL-2 therapy were to be given in order to maintain the CD4+ cell count greater than twice baseline or  $\geq 1000$  cells/mm<sup>3</sup>.

### **Study Design**

#### SILCAAT

Patients were randomized to IL-2 or control (1:1) within strata defined by clinical site and CD4+ cell count (50-199 and 200-299 cells/mm<sup>3</sup>) (Web Figure 1a).

The original design of SILCAAT specified a target of 210 primary events and assumed a CD4+ cell count difference between treatment groups of 75 cells/mm<sup>3</sup>. At the time of the change in sponsorship and amendment in February 2003 the target number of primary events was increased to 300 because some deaths occurring as primary events would be unrelated to HIV and IL-2 and this was expected to reduce the treatment difference. With 300 primary events, power was 80% to detect a 28% reduction in the rate of opportunistic disease or death between the two treatment groups (hazard ratio of 0.72) with a two-sided alpha level of 0.05.

## ESPRIT

Patients were randomized to IL-2 or control (1:1) within strata defined by clinical site (Web Figure 1b).

For ESPRIT, we calculated that 320 primary events would be required to have statistical power of 80% to detect a 27% reduction in the rate of opportunistic disease or death between the two treatment groups (hazard ratio of 0.73) with a two-sided alpha level of 0.05. The hypothesized treatment effect took into account the projected CD4+ difference between the IL-2 and control group (140 cells/mm<sup>3</sup>) and the likely proportion of deaths unrelated to HIV and to IL-2 (10% of primary events). During the study, it became apparent that non-AIDS deaths made up a larger proportion of primary endpoints than estimated and the overall event rate was lower than anticipated. Consideration was given to re-powering the study, but in light of data from other sources indicating that the risk of non-AIDS deaths was inversely related to latest CD4+ cell count levels, the target number of primary events was not modified.

## **Inclusion and Exclusion Criteria**

### SILCAAT

Patients in SILCAAT were ≥18 years with confirmed HIV-1 infection, CD4+ cell count ≥ 50 cells/mm<sup>3</sup> and < 300 cells/mm<sup>3</sup>, HIV RNA level < 10,000 copies/mL, and on stable ART (≥ 2 drugs for ≥ 4 months prior to randomization, with no change in the type of ART received during this 4-month period of time). The main exclusion criteria were a recent history of an AIDS-defining illness, evidence of active infection, any significant medical condition, current pregnancy, breastfeeding, and use of corticosteroids or immunosuppressants.

After the change in study management and amendment of the protocol in 2003 some patients chose not to re-consent for the study and some sites were no longer able to participate due to

reduced compensation. Some of the patients from sites that discontinued participation were transferred to other sites for the remainder of the trial, but for many patients this was not possible. The following algorithm was then used to define the primary analysis cohort: all randomized patients at sites for which at least two-thirds (67%) of their patients consented to the amended protocol or had died were included in the primary analysis. This definition of the primary analysis cohort represented a compromise between controlling bias due to possible selective and differential lost to follow-up by treatment group and maintaining power by including a large enough sample size to address the study objectives (Web Figure 1a).

### ESPRIT

Patients in ESPRIT were  $\geq 18$  years with confirmed HIV-1 infection, CD4+ cell count  $\geq 300$  cells/mm<sup>3</sup> and no evidence of active clinical disease for at least one year prior to randomization. The main exclusion criteria for ESPRIT were current or prior autoimmune disease, including inflammatory bowel disease, current pregnancy, breastfeeding or use of corticosteroids and/or immunosuppressants.

ESPRIT was preceded by four randomized phase II trials at sites in Argentina, Thailand, and the United States. These trials (vanguard studies) had CD4+ change as the primary endpoint rather than clinical disease progression. Patients in these vanguard studies were invited to enroll in ESPRIT and new consent was obtained. Sites where at least 90% of the vanguard patients consented to ESPRIT were included in the primary analysis (Web Figure 1b). In three of the vanguard studies, entry CD4+ cell count was  $\geq 350$  cells/mm<sup>3</sup>. In each of these vanguard studies, some patients were assigned a lower dose of IL-2 (1.5 or 4.5 MIU) for the induction phase. These patients were encouraged but not required to escalate to the 7.5 MIU dose.

### Endpoint Definitions

For both ESPRIT and SILCAAT the following new or recurrent opportunistic diseases were included in the primary endpoint were: invasive aspergillosis; bartonellosis; esophageal candidiasis; candidiasis of bronchi, trachea, or lungs; invasive cervical cancer; Chagas disease of the central nervous system; cytomegalovirus virus (CMV) disease; CMV retinitis; disseminated or extrapulmonary coccidioidomycosis; chronic intestinal cryptosporidiosis; extrapulmonary cryptococcosis; HIV-related encephalopathy; *Herpes simplex*, chronic ulcers, bronchitis, pneumonitis, or esophagitis; *Herpes zoster*, multi-dermatomal; disseminated or extrapulmonary histoplasmosis; chronic intestinal isosporiasis; Kaposi's sarcoma; visceral leishmaniasis; Burkitt's lymphoma; Hodgkin's lymphoma; non-Hodgkin's lymphoma; primary lymphoma of the brain; tuberculosis; microsporidiosis (1 month's duration); disseminated or extrapulmonary *Mycobacterium avium* complex or *M. kansasii*; other disseminated or extrapulmonary non-tuberculous mycobacterial species or unidentified species; nocardiosis; disseminated *Penicillium marneffe*; extrapulmonary *Pneumocystis jirovecii*; *Pneumocystis jirovecii* pneumonia; recurrent bacterial pneumonia (2 episodes within 1 year of each other following randomization); progressive multifocal leukoencephalopathy; *Rhodococcus equi* disease; recurrent *Salmonella* septicemia (2 episodes within 1 year of each other following randomization); toxoplasmosis of brain; wasting syndrome due to HIV.

Using pre-established criteria, an endpoint review committee that was unaware of the treatment assignment reviewed the source documentation of events reported as opportunistic diseases and all deaths. Opportunistic diseases classified as confirmed or probable were considered primary endpoints, as were all deaths, irrespective of cause. For patients who died, the endpoint review committee also classified the underlying cause of death using the Coding of Death in HIV (CoDe) system (<http://www.cphiv.dk>) .

## **Interim Monitoring**

For both ESPRIT and SILCAAT, O'Brien-Fleming boundaries and the Lan-DeMets spending function were used as monitoring guidelines for the primary endpoint comparison.

For ESPRIT, futility guidelines were also provided to the DSMB. Since the beneficial effects of IL-2 might not be realized until later in follow-up, a planned futility analysis was to be carried out when 200 of 320 planned primary events had accrued. As a guideline, the (DSMB) was asked to assess whether at least a 10% lower rate of the primary endpoint in the IL-2 group compared to the control group was likely.

## **Web Figure Legends**

Web Figure Ia: SILCAAT Study Design and CONSORT Flow Diagram. Endpoint status was considered known if the patient had been seen in the previous year.

Web Figure Ib: ESPRIT Study Design and CONSORT Flow Diagram. Endpoint status was considered known if the patient had been seen in the previous year.

Web Figure IIa: SILCAAT Study: Percent with HIV RNA  $\leq$  500 copies/mL by Follow-up Visit and Treatment Group.

Web Figure IIb: ESPRIT Study: Percent with HIV RNA  $\leq$  500 copies/mL by Follow-up Visit and Treatment Group.

Web Figure III: Cumulative Probability (x100) of Fatal or Non-Fatal OD by Treatment Group for SILCAAT and ESPRIT.

Web Figure IV: Cumulative Probability (x100) of Grade 4 Events by Treatment Group for SILCAAT and ESPRIT.

**Web Figure 1a. SILCAAT study design and consort flow diagram**

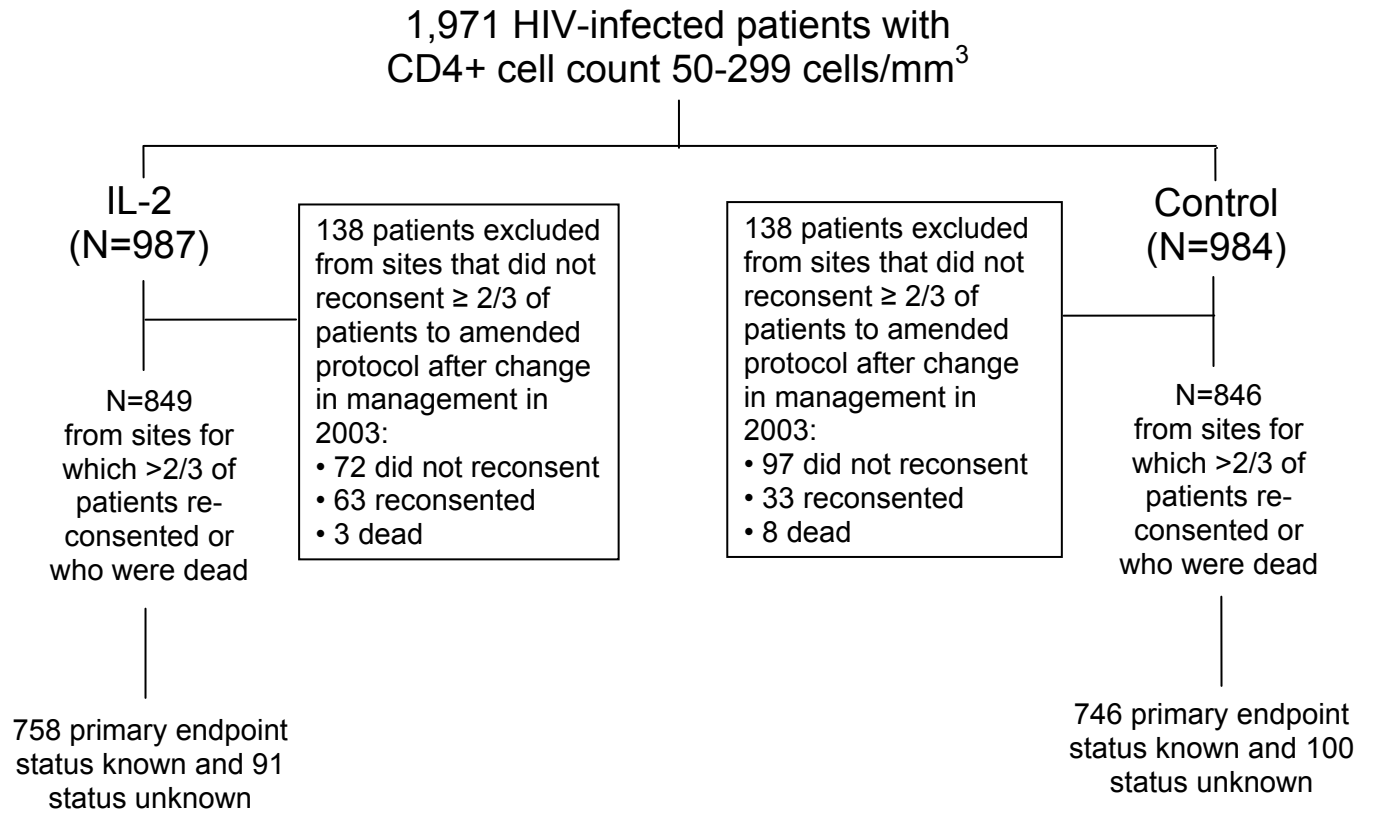



Web Figure 1b. ESPRIT study design and CONSORT flow diagram

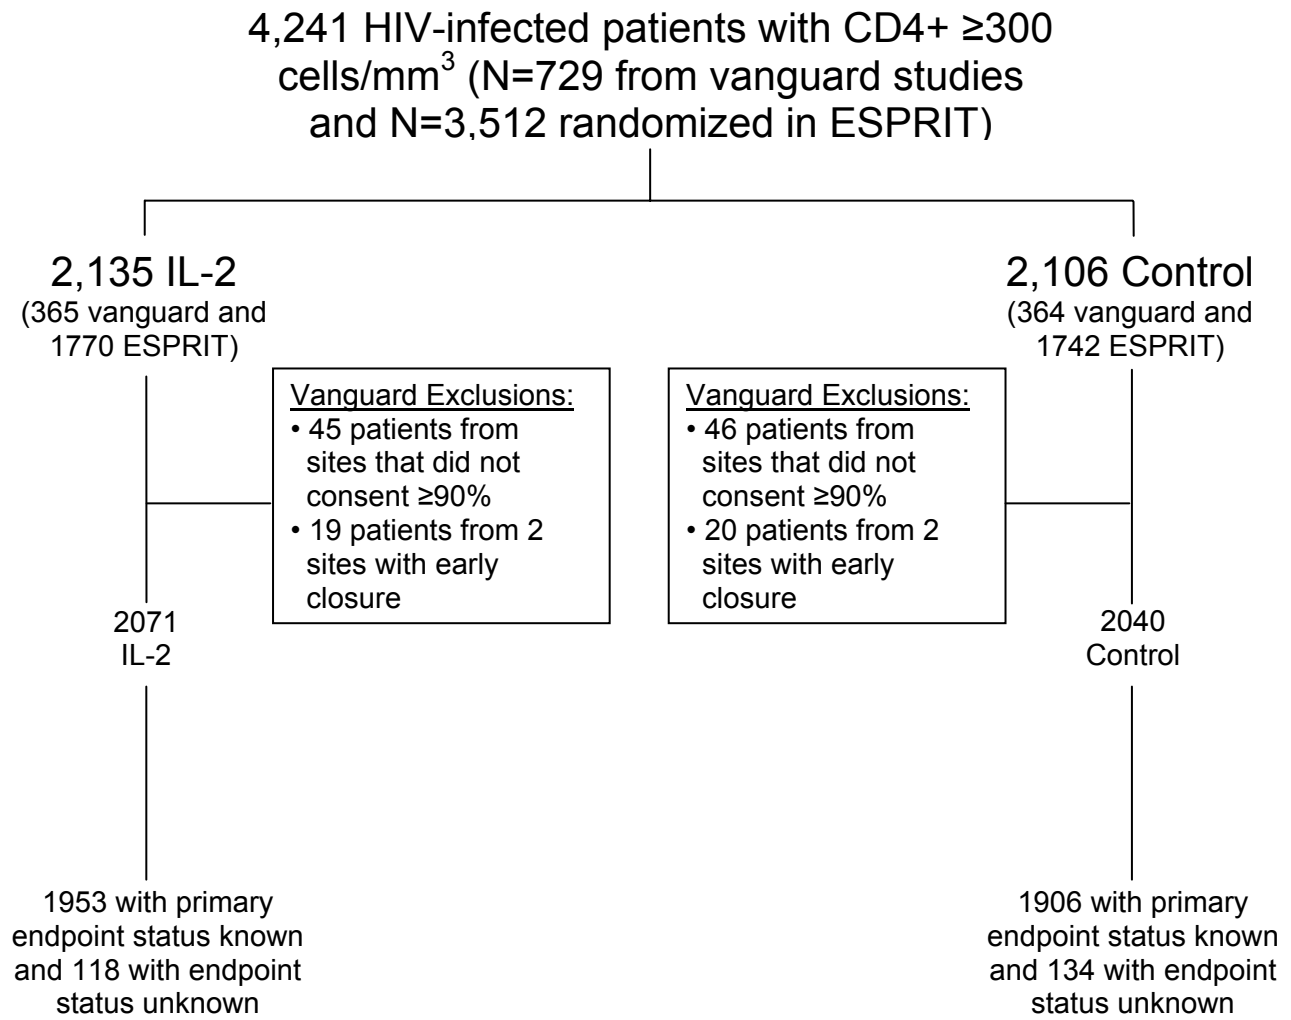

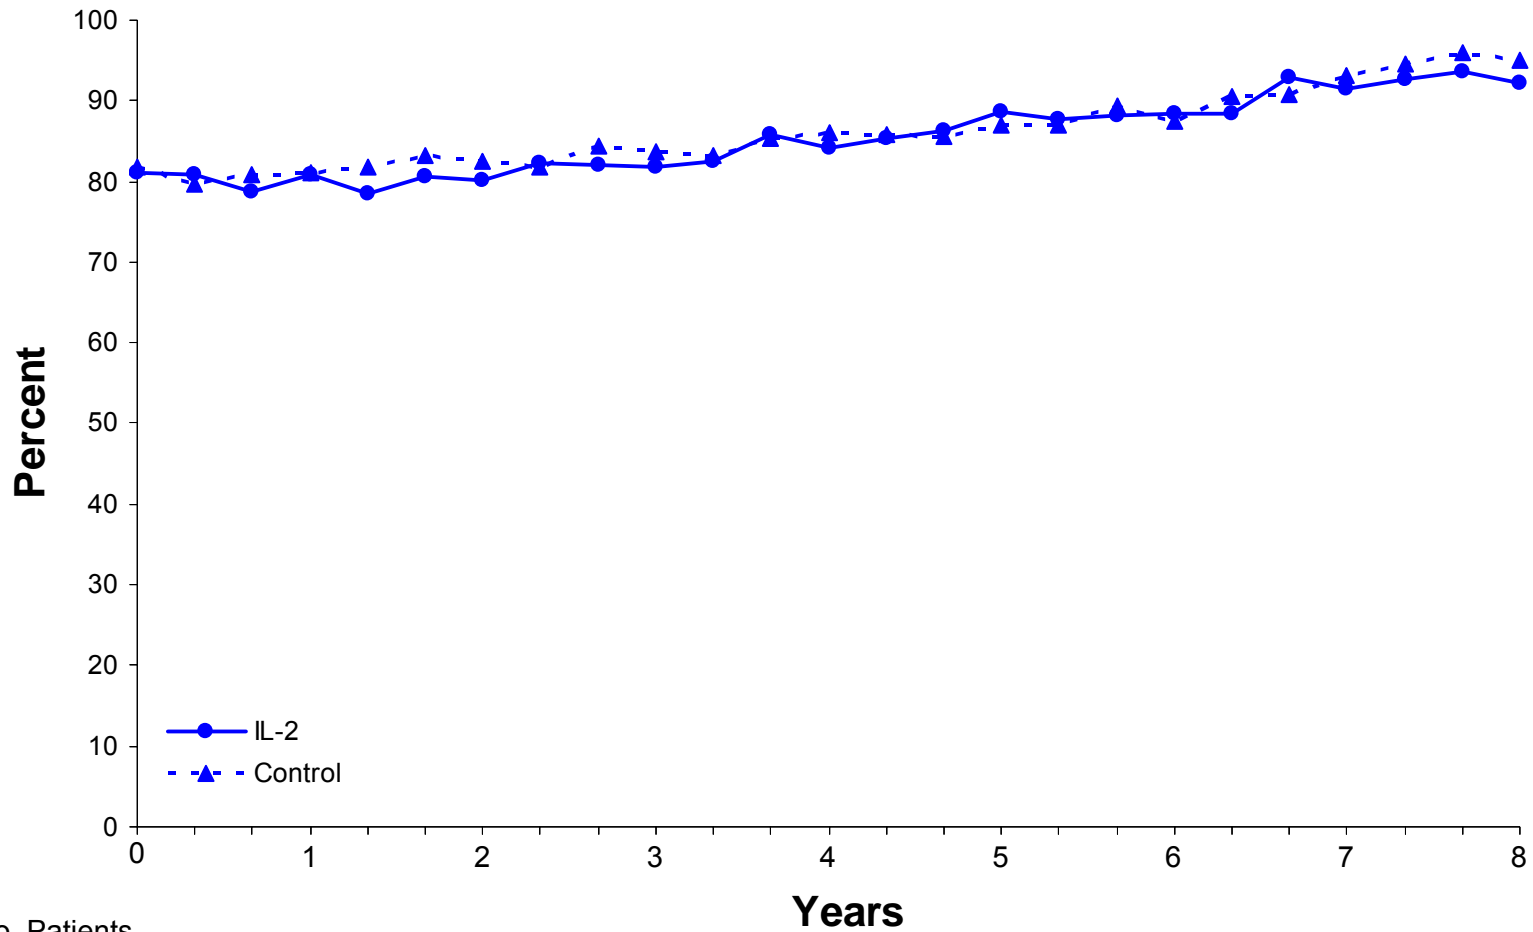

No. Patients

IL-2: 849 744 669 644 646 621 597 440 244

Control: 845 767 688 661 641 633 597 444 223

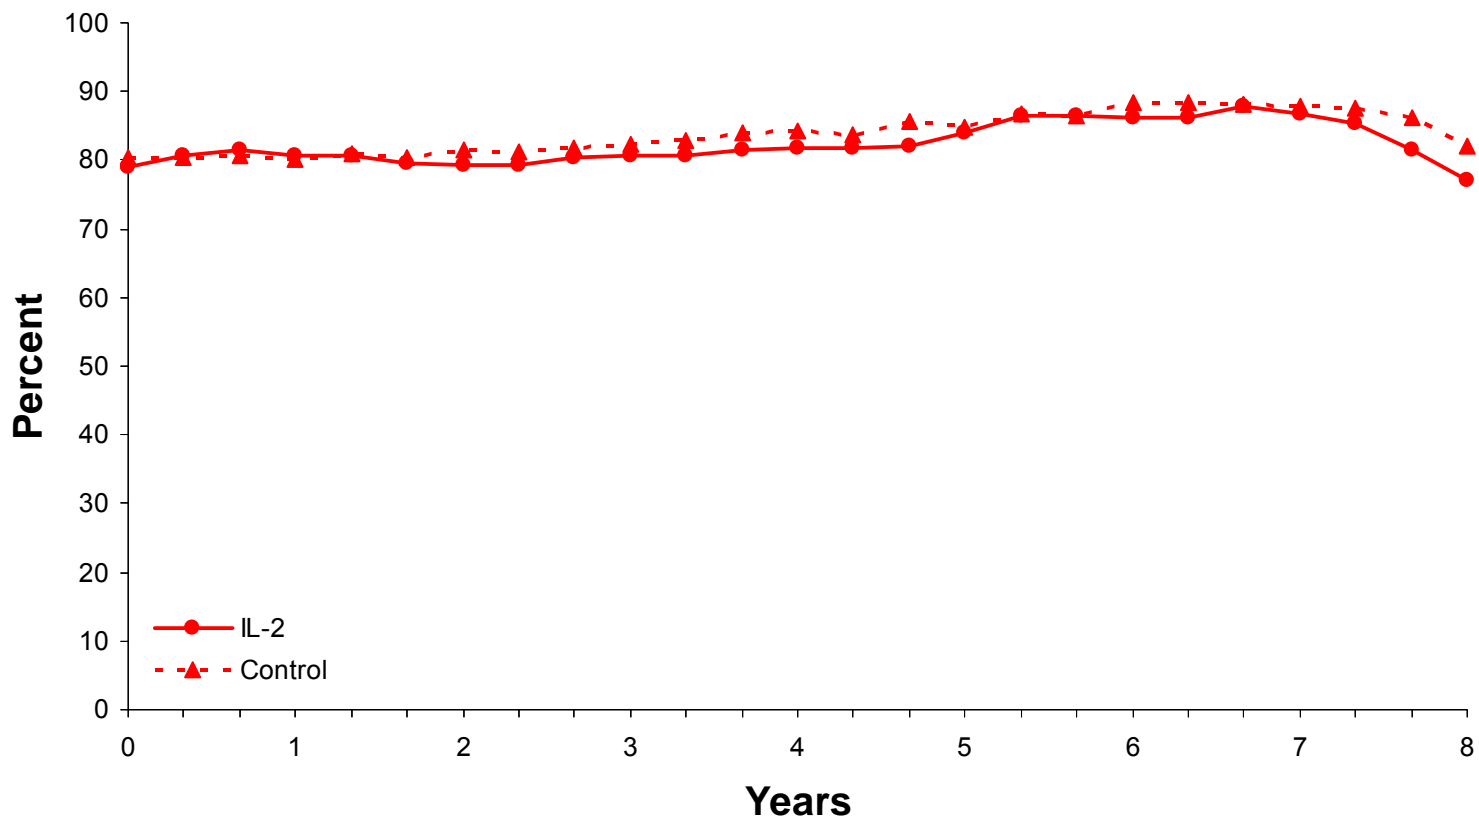

| No. Patients |                                                                                    |
|--------------|------------------------------------------------------------------------------------|
| IL-2:        | 2065      1944      1864      1828      1774      1735      1419      894      301 |
| Control:     | 2036      1921      1857      1791      1725      1643      1351      828      252 |

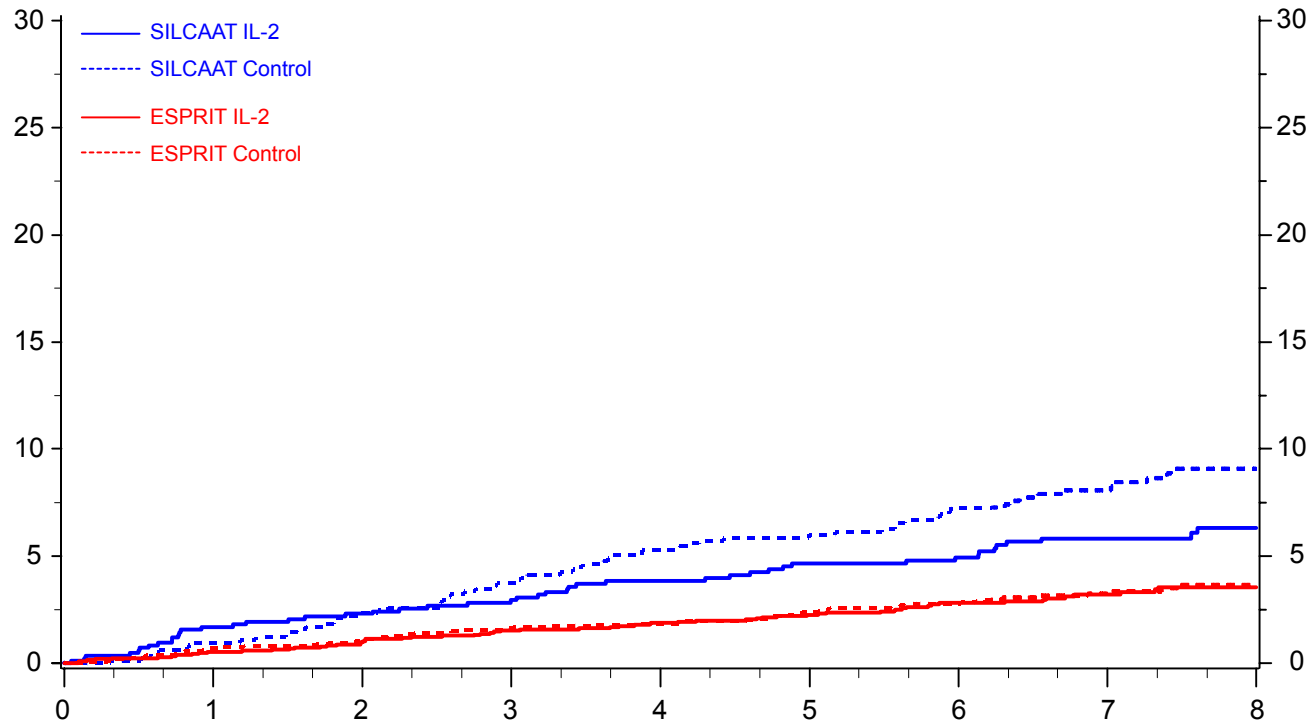

|                         |      |      |      |      |      |      |      |     |     |
|-------------------------|------|------|------|------|------|------|------|-----|-----|
| <i>SILCAAT IL-2:</i>    | 849  | 807  | 779  | 757  | 726  | 698  | 683  | 497 | 257 |
| <i>SILCAAT Control:</i> | 846  | 810  | 779  | 746  | 706  | 679  | 651  | 494 | 247 |
| <i>ESPRIT IL-2:</i>     | 2071 | 2030 | 1998 | 1948 | 1910 | 1874 | 1553 | 974 | 322 |
| <i>ESPRIT Control:</i>  | 2040 | 2003 | 1963 | 1919 | 1884 | 1825 | 1486 | 909 | 271 |

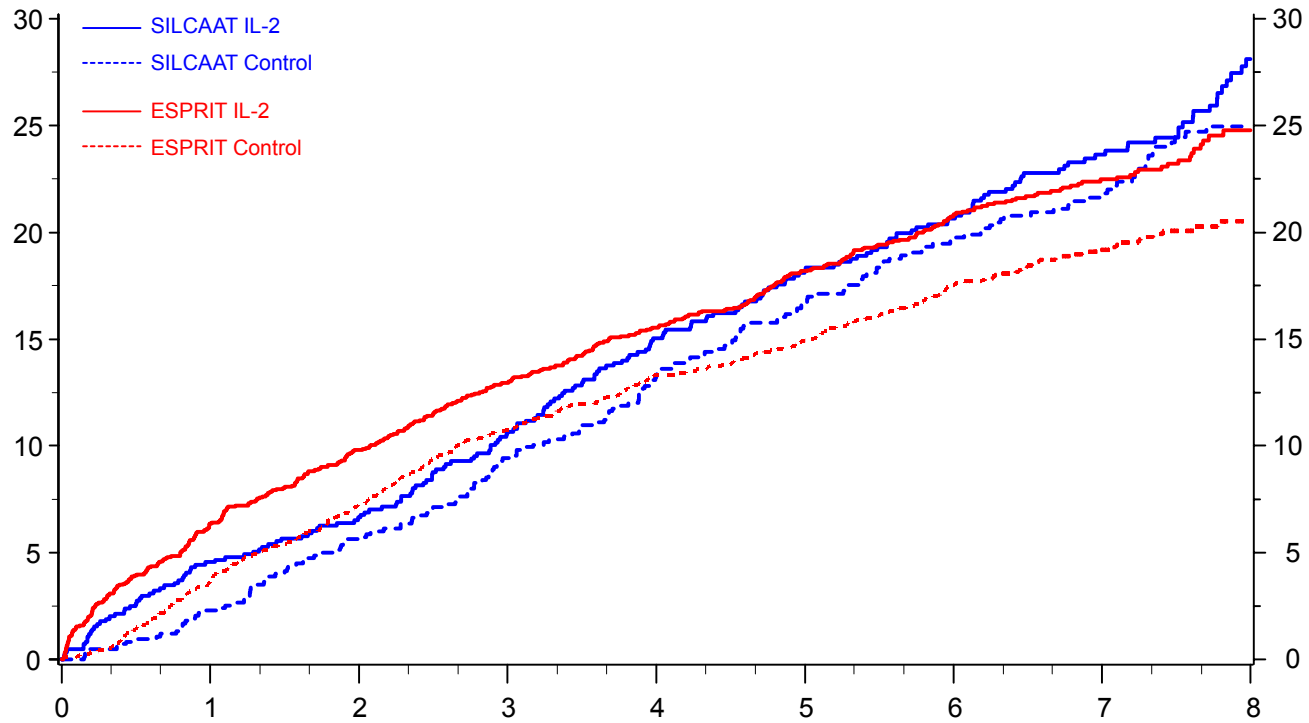

|                  |      |      |      |      |      |      |      |     |     |
|------------------|------|------|------|------|------|------|------|-----|-----|
| SILCAAT IL-2:    | 849  | 788  | 750  | 703  | 652  | 612  | 587  | 416 | 199 |
| SILCAAT Control: | 846  | 802  | 757  | 705  | 651  | 611  | 573  | 430 | 212 |
| ESPRIT IL-2:     | 2071 | 1914 | 1822 | 1728 | 1652 | 1578 | 1261 | 768 | 253 |
| ESPRIT Control:  | 2040 | 1943 | 1844 | 1748 | 1674 | 1603 | 1271 | 765 | 233 |

**Web Table Ia. Baseline Characteristics of Participants by Treatment Group - SILCAAT**

| Characteristic                                        | IL-2 Group<br>(N = 849) | Control Group<br>(N = 846) |
|-------------------------------------------------------|-------------------------|----------------------------|
| Age (yr)                                              |                         |                            |
| Median                                                | 40                      | 40                         |
| Interquartile range                                   | 36, 47                  | 36, 47                     |
| Female sex (%)                                        | 16.1                    | 16.9                       |
| Race (%)                                              |                         |                            |
| Black                                                 | 7.8                     | 9.1                        |
| White                                                 | 80.0                    | 79.6                       |
| Other                                                 | 12.2                    | 11.3                       |
| CD4+ count (cells/mm <sup>3</sup> )                   |                         |                            |
| Median                                                | 202                     | 202                        |
| Interquartile range                                   | 154, 254                | 148, 255                   |
| CD4+ nadir (cells/mm <sup>3</sup> )                   |                         |                            |
| Median                                                | 59                      | 60                         |
| Interquartile range                                   | 24, 104                 | 28, 108                    |
| HIV RNA ≤ 500 (copies/mL (%)                          | 81.0                    | 81.8                       |
| AIDS diagnosis (%)                                    | 33.7                    | 31.3                       |
| Body mass index (kg/m <sup>2</sup> )                  |                         |                            |
| Median                                                | 24.0                    | 23.8                       |
| Interquartile range                                   | 21.9, 26.2              | 21.7, 25.9                 |
| Antiretroviral history (%)                            |                         |                            |
| PI experience                                         | 85.7                    | 85.2                       |
| NNRTI experience                                      | 58.8                    | 56.6                       |
| NRTI, PI, and NNRTI experience                        | 45.3                    | 43.3                       |
| Time since first prescribed antiretroviral drugs (yr) |                         |                            |
| Median                                                | 3.9                     | 4.0                        |
| Interquartile range                                   | 1.7, 6.9                | 1.9, 7.4                   |
| Current antiretroviral regimen (%)                    |                         |                            |
| Includes PI                                           | 67.7                    | 63.3                       |
| Includes NNRTI                                        | 45.5                    | 46.2                       |
| Includes NRTI, PI, and NNRTI                          | 15.0                    | 12.9                       |

**Web Table Ib. Baseline Characteristics of Participants by Treatment Group - ESPRIT**

| <b>Characteristic</b>                                 | <b>IL-2 Group<br/>(N = 2071)</b> | <b>Control Group<br/>(N = 2040)</b> |
|-------------------------------------------------------|----------------------------------|-------------------------------------|
| Age (yr)                                              |                                  |                                     |
| Median                                                | 40                               | 40                                  |
| Interquartile range                                   | 35, 46                           | 34, 46                              |
| Female sex (%)                                        | 18.6                             | 18.7                                |
| Race (%)                                              |                                  |                                     |
| Black                                                 | 9.5                              | 8.8                                 |
| White                                                 | 75.1                             | 75.5                                |
| Other                                                 | 15.5                             | 15.6                                |
| CD4+ count (cells/mm <sup>3</sup> )                   |                                  |                                     |
| Median                                                | 464                              | 450                                 |
| Interquartile range                                   | 373, 590                         | 370, 576                            |
| CD4+ nadir (cells/mm <sup>3</sup> )                   |                                  |                                     |
| Median                                                | 200                              | 194                                 |
| Interquartile range                                   | 93, 308                          | 90, 304                             |
| HIV RNA ≤ 500 (copies/mL (%)                          | 79.0                             | 80.4                                |
| AIDS diagnosis (%)                                    | 25.2                             | 26.5                                |
| Body mass index (kg/m <sup>2</sup> )                  |                                  |                                     |
| Median                                                | 23.8                             | 23.7                                |
| Interquartile range                                   | 21.9, 26.0                       | 21.9, 25.9                          |
| Antiretroviral history (%)                            |                                  |                                     |
| PI experience                                         | 72.8                             | 72.1                                |
| NNRTI experience                                      | 56.5                             | 59.4                                |
| NRTI, PI, and NNRTI experience                        | 37.4                             | 39.6                                |
| Time since first prescribed antiretroviral drugs (yr) |                                  |                                     |
| Median                                                | 4.1                              | 4.3                                 |
| Interquartile range                                   | 2.2, 6.3                         | 2.1, 6.5                            |
| Current antiretroviral regimen (%)                    |                                  |                                     |
| Includes PI                                           | 50.5                             | 47.5                                |
| Includes NNRTI                                        | 44.7                             | 47.9                                |
| Includes NRTI, PI, and NNRTI                          | 7.7                              | 8.1                                 |

**Web Table IIa: Rate of Specific Opportunistic Diseases by Treatment Group - SILCAAT**

| Event                                    | IL-2 |      | Control |      |
|------------------------------------------|------|------|---------|------|
|                                          | N    | Rate | N       | Rate |
| Aspergillosis                            | 0    | 0.00 | 2       | 0.03 |
| Bacterial pneumonia, recurrent           | 3    | 0.05 | 4       | 0.07 |
| Bartonellosis                            | 0    | 0.00 | 0       | 0.00 |
| Candidiasis of the bronchi/trachea/lungs | 0    | 0.00 | 0       | 0.00 |
| Candidiasis esophageal                   | 10   | 0.17 | 19      | 0.33 |
| Cervical carcinoma*                      | 0    | 0.00 | 0       | 0.00 |
| Chagas disease of the CNS                | 0    | 0.00 | 0       | 0.00 |
| CMV disease                              | 0    | 0.00 | 2       | 0.03 |
| Coccidioidomycosis                       | 0    | 0.00 | 0       | 0.00 |
| Cryptococcosis                           | 4    | 0.07 | 8       | 0.14 |
| Cryptosporidiosis                        | 3    | 0.05 | 2       | 0.03 |
| Herpes simplex                           | 1    | 0.02 | 6       | 0.10 |
| Herpes zoster – multidermatomal          | 1    | 0.02 | 2       | 0.03 |
| Histoplasmosis                           | 0    | 0.00 | 1       | 0.02 |
| HIV Encephalopathy                       | 1    | 0.02 | 0       | 0.00 |
| Isosporiasis                             | 1    | 0.02 | 0       | 0.00 |
| Kaposi's sarcoma                         | 2    | 0.03 | 2       | 0.03 |
| Leishmaniasis – visceral                 | 1    | 0.02 | 2       | 0.03 |
| Lymphoma – Hodgkins                      | 2    | 0.03 | 2       | 0.03 |
| Lymphoma – non-Hodgkins                  | 9    | 0.16 | 12      | 0.21 |
| Lymphoma – primary brain                 | 0    | 0.00 | 0       | 0.00 |
| Microsporidiosis                         | 0    | 0.00 | 0       | 0.00 |
| Mycobacterium avium complex              | 0    | 0.00 | 0       | 0.00 |
| Mycobacterial infection – other          | 0    | 0.00 | 1       | 0.02 |
| Nocardiosis                              | 0    | 0.00 | 0       | 0.00 |
| Penicillium marneffeii                   | 0    | 0.00 | 0       | 0.00 |
| Pneumocystis jiroveci pneumonia          | 6    | 0.10 | 7       | 0.12 |
| Pneumocystis jiroveci extrapulmonary     | 0    | 0.00 | 0       | 0.00 |
| PML                                      | 2    | 0.03 | 0       | 0.00 |
| Rhodococcus equi disease                 | 0    | 0.00 | 0       | 0.00 |
| Salmonella septicemia, recurrent         | 0    | 0.00 | 0       | 0.00 |
| Toxoplasmosis of the brain               | 2    | 0.03 | 1       | 0.02 |
| Tuberculosis                             | 8    | 0.14 | 3       | 0.05 |
| Wasting syndrome                         | 1    | 0.02 | 4       | 0.07 |

\*Women only. Rates are per 100 person-years



**Web Table IIb: Rate of Specific Opportunistic Diseases by Treatment Group - ESPRIT**

| Event                                    | IL-2 |      | Control |      |
|------------------------------------------|------|------|---------|------|
|                                          | N    | Rate | N       | Rate |
| Aspergillosis                            | 0    | 0.00 | 0       | 0.00 |
| Bacterial pneumonia - recurrent          | 4    | 0.03 | 4       | 0.03 |
| Bartonellosis                            | 0    | 0.00 | 0       | 0.00 |
| Candidiasis of the bronchi/trachea/lungs | 0    | 0.00 | 0       | 0.00 |
| Candidiasis esophageal                   | 9    | 0.06 | 10      | 0.07 |
| Cervical carcinoma*                      | 4    | 0.15 | 4       | 0.15 |
| Chagas disease of the CNS                | 0    | 0.00 | 0       | 0.00 |
| CMV disease                              | 5    | 0.04 | 0       | 0.00 |
| Coccidioidomycosis                       | 0    | 0.00 | 0       | 0.00 |
| Cryptococcosis                           | 3    | 0.02 | 1       | 0.01 |
| Cryptosporidiosis                        | 4    | 0.03 | 1       | 0.01 |
| Herpes simplex                           | 1    | 0.01 | 1       | 0.01 |
| Herpes zoster – multidermatomal          | 1    | 0.01 | 1       | 0.01 |
| Histoplasmosis                           | 1    | 0.01 | 0       | 0.00 |
| HIV Encephalopathy                       | 4    | 0.03 | 0       | 0.00 |
| Isosporiasis                             | 1    | 0.01 | 0       | 0.00 |
| Kaposi's sarcoma                         | 2    | 0.01 | 6       | 0.04 |
| Leishmaniasis – visceral                 | 0    | 0.00 | 1       | 0.01 |
| Lymphoma – Hodgkins                      | 5    | 0.04 | 7       | 0.05 |
| Lymphoma – non-Hodgkins                  | 12   | 0.08 | 10      | 0.07 |
| Lymphoma – primary brain                 | 1    | 0.01 | 1       | 0.01 |
| Microsporidiosis                         | 0    | 0.00 | 0       | 0.00 |
| Mycobacterium avium complex              | 0    | 0.00 | 0       | 0.00 |
| Mycobacterial infection – other          | 1    | 0.01 | 0       | 0.00 |
| Nocardiosis                              | 0    | 0.00 | 1       | 0.01 |
| Penicillium marneffeii                   | 0    | 0.00 | 0       | 0.00 |
| Pneumocystis jiroveci pneumonia          | 10   | 0.07 | 11      | 0.08 |
| Pneumocystis jiroveci extrapulmonary     | 0    | 0.00 | 0       | 0.00 |
| PML                                      | 1    | 0.01 | 0       | 0.00 |
| Rhodococcus equi disease                 | 0    | 0.00 | 0       | 0.00 |
| Salmonella septicemia, recurrent         | 0    | 0.00 | 0       | 0.00 |
| Toxoplasmosis of the brain               | 2    | 0.01 | 0       | 0.00 |
| Tuberculosis                             | 6    | 0.04 | 8       | 0.06 |
| Wasting syndrome                         | 2    | 0.01 | 2       | 0.01 |

\*Women only. Rates are per 100 person-years

**Web Table IIIa: Rate<sup>+</sup> of Specific Causes of Death by Treatment Group - SILCAAT**

|                                                       | <u>IL-2 Group</u> |             | <u>Control Group</u> |             |
|-------------------------------------------------------|-------------------|-------------|----------------------|-------------|
|                                                       | <u>N</u>          | <u>Rate</u> | <u>N</u>             | <u>Rate</u> |
| Opportunistic Disease (OD) <sup>++</sup>              | 11                | 3.14        | 17                   | 5.08        |
| Cardiovascular disease or sudden death                | 7                 | 2.00        | 13                   | 3.89        |
| Hepatic                                               | 9                 | 2.57        | 5                    | 1.49        |
| Infection (excluding OD, hepatitis B and hepatitis C) | 4                 | 1.14        | 8                    | 2.39        |
| Non-AIDS malignancies                                 | 20                | 5.71        | 16                   | 4.78        |
| Accidents/violence                                    | 2                 | 0.57        | 1                    | 0.30        |
| Substance abuse                                       | 0                 | 0.00        | 2                    | 0.60        |
| Suicide                                               | 4                 | 1.14        | 0                    | 0.00        |
| Other                                                 | 11                | 3.14        | 3                    | 0.90        |
| Cause unknown                                         | 13                | 3.71        | 12                   | 3.59        |

<sup>++</sup> Deaths from OD included 3 IL-2 and 10 control deaths due to AIDS-malignancies.

<sup>+</sup> Rates are per 100 person-years

**Web Table IIIb: Rate<sup>+</sup> of Specific Causes of Death by Treatment Group - ESPRIT**

|                                                       | <u>IL-2 Group</u> |             | <u>Control Group</u> |             |
|-------------------------------------------------------|-------------------|-------------|----------------------|-------------|
|                                                       | <u>N</u>          | <u>Rate</u> | <u>N</u>             | <u>Rate</u> |
| Opportunistic Disease (OD) <sup>++</sup>              | 10                | 0.07        | 10                   | 0.07        |
| Cardiovascular disease or sudden death                | 11                | 0.08        | 16                   | 0.11        |
| Hepatic                                               | 8                 | 0.06        | 14                   | 0.10        |
| Infection (excluding OD, hepatitis B and hepatitis C) | 9                 | 0.06        | 6                    | 0.04        |
| Non-AIDS malignancies                                 | 22                | 0.15        | 20                   | 0.14        |
| Accidents/violence                                    | 5                 | 0.04        | 9                    | 0.06        |
| Substance abuse                                       | 5                 | 0.04        | 8                    | 0.06        |
| Suicide                                               | 10                | 0.07        | 5                    | 0.04        |
| Other                                                 | 13                | 0.09        | 11                   | 0.08        |
| Cause unknown                                         | 14                | 0.10        | 17                   | 0.12        |

<sup>++</sup> Deaths from OD included 6 IL-2 and 10 control deaths due to AIDS-malignancies.

<sup>+</sup>Rates are per 100 person-years

**Web Table IVa: Rate of Grade 4 Clinical Events  
by MedDRA Primary System Organ Class and Treatment Group - SILCAAT**

| <u>System Organ Class</u>                            | <u>IL-2</u> |             | <u>Control</u> |             |
|------------------------------------------------------|-------------|-------------|----------------|-------------|
|                                                      | <u>No.</u>  | <u>Rate</u> | <u>No.</u>     | <u>Rate</u> |
| Blood and lymphatic system disorders                 | 7           | 0.12        | 6              | 0.10        |
| Cardiac disorders                                    | 27          | 0.47        | 29             | 0.51        |
| Congenital, familial and genetic disorders           | 1           | 0.02        | 0              | 0.00        |
| Ear and labyrinth disorders                          | 0           | 0.00        | 0              | 0.00        |
| Endocrine disorders                                  | 0           | 0.00        | 3              | 0.05        |
| Eye disorders                                        | 0           | 0.00        | 1              | 0.02        |
| Gastrointestinal disorders                           | 44          | 0.78        | 25             | 0.44        |
| General disorders and administration site conditions | 11          | 0.19        | 5              | 0.09        |
| Hepatobiliary disorders                              | 24          | 0.42        | 18             | 0.31        |
| Immune system disorders                              | 1           | 0.02        | 2              | 0.03        |
| Infections and infestations                          | 50          | 0.89        | 51             | 0.90        |
| Injury, poisoning and procedural complications       | 11          | 0.19        | 17             | 0.30        |
| Investigations                                       | 1           | 0.02        | 2              | 0.03        |
| Metabolism and nutrition disorders                   | 6           | 0.10        | 6              | 0.10        |
| Musculoskeletal and connective tissue disorders      | 10          | 0.17        | 11             | 0.19        |
| Neoplasms benign, malignant and unspecified          | 41          | 0.72        | 35             | 0.62        |
| Nervous system disorders                             | 20          | 0.35        | 19             | 0.33        |
| Pregnancy, puerperium, and perinatal conditions*     | 0           | 0.00        | 0              | 0.00        |
| Psychiatric disorders                                | 20          | 0.35        | 8              | 0.14        |
| Renal and urinary disorders                          | 11          | 0.19        | 18             | 0.32        |
| Reproductive system and breast disorders             | 1           | 0.02        | 6              | 0.10        |
| Respiratory, thoracic and mediastinal disorders      | 13          | 0.22        | 17             | 0.30        |
| Skin and subcutaneous tissue disorders               | 3           | 0.05        | 2              | 0.03        |
| Social circumstances                                 | 0           | 0.00        | 0              | 0.00        |
| Surgical and medical procedures                      | 3           | 0.05        | 1              | 0.02        |
| Vascular disorders                                   | 10          | 0.17        | 7              | 0.12        |

\* Women only. Rates are per 100 person-years

**Web Table IVb: Rate of Grade 4 Clinical Events  
by MedDRA Primary System Organ Class and Treatment Group - ESPRIT**

| <u>System Organ Class</u>                            | <u>IL-2</u> |             | <u>Control</u> |             |
|------------------------------------------------------|-------------|-------------|----------------|-------------|
|                                                      | <u>No.</u>  | <u>Rate</u> | <u>No.</u>     | <u>Rate</u> |
| Blood and lymphatic system disorders                 | 20          | 0.14        | 21             | 0.15        |
| Cardiac disorders                                    | 58          | 0.42        | 53             | 0.39        |
| Congenital, familial and genetic disorders           | 2           | 0.01        | 1              | 0.01        |
| Ear and labyrinth disorders                          | 3           | 0.02        | 0              | 0.00        |
| Endocrine disorders                                  | 7           | 0.05        | 2              | 0.01        |
| Eye disorders                                        | 8           | 0.06        | 7              | 0.05        |
| Gastrointestinal disorders                           | 66          | 0.47        | 63             | 0.46        |
| General disorders and administration site conditions | 41          | 0.29        | 21             | 0.15        |
| Hepatobiliary disorders                              | 32          | 0.23        | 25             | 0.18        |
| Immune system disorders                              | 6           | 0.04        | 3              | 0.02        |
| Infections and infestations                          | 94          | 0.68        | 89             | 0.66        |
| Injury, poisoning and procedural complications       | 34          | 0.24        | 27             | 0.20        |
| Investigations                                       | 22          | 0.16        | 12             | 0.09        |
| Metabolism and nutrition disorders                   | 22          | 0.16        | 14             | 0.10        |
| Musculoskeletal and connective tissue disorders      | 21          | 0.15        | 26             | 0.19        |
| Neoplasms benign, malignant and unspecified          | 61          | 0.43        | 60             | 0.44        |
| Nervous system disorders                             | 60          | 0.43        | 49             | 0.36        |
| Pregnancy, puerperium, and perinatal conditions*     | 5           | 0.19        | 2              | 0.08        |
| Psychiatric disorders                                | 44          | 0.31        | 29             | 0.21        |
| Renal and urinary disorders                          | 26          | 0.18        | 26             | 0.19        |
| Reproductive system and breast disorders             | 10          | 0.07        | 8              | 0.06        |
| Respiratory, thoracic and mediastinal disorders      | 35          | 0.25        | 32             | 0.23        |
| Skin and subcutaneous tissue disorders               | 8           | 0.06        | 6              | 0.04        |
| Social circumstances                                 | 1           | 0.01        | 1              | 0.01        |
| Surgical and medical procedures                      | 2           | 0.01        | 3              | 0.02        |
| Vascular disorders                                   | 40          | 0.28        | 14             | 0.10        |

Women only. Rates are per 100 person-years

**The members of the ESPRIT and SILCAT study groups are as follows:**

**Coordinating Centers: Copenhagen:** B Aagaard, E Aragon, J Arnaiz, L Borup, B Clotet, U Dragsted, A Fau, D Gey, J Grarup, U Hengge, P Herrero, P Jansson, B Jensen, K Jensen, H Juncher, P Lopez, J Lundgren, C Matthews, D Mollerup, M Pearson, A Phillips, S Reilev, K Tillmann, S Varea. **London:** B Angus, A Babiker, B Cordwell, J Darbyshire, W Dodds, S Fleck, J Horton, F Hudson, Y Moraes, F Pacciarini, A Palfreeman, N Paton, N Smith, F van Hooff.

**Minneapolis:** J Bebchuk, G Collins, E Denning, A DuChene, L Fosdick, M Harrison, K Herman-Lamin, E Krum, G Larson, J Neaton, R Nelson, K Quan, S Quan, T Schultz, G Thompson, D Wentworth, N Wyman. **Sydney:** C Carey, F Chan, D Cooper, B Cordwell, D Courtney-Rodgers, F Drummond, S Emery, M Harrod, S Jacoby, L Kearney, M Law, E Lin, S Pett, R Robson, N Seneviratne, M Stewart, E Watts. **Washington:** E Finley, F Gordin, A Sánchez, B Standridge, M Vjecha.

**Endpoint Review Committee:** W Belloso, R Davey, D Duprez, J Gatell, J Hoy, A Lifson, C Pederson, G Perez, R Price, R Prineas, F Rhame, J Sampson, J Worley.

**Data and Safety Monitoring Board:** J Modlin, V Beral, R Chaisson, T Fleming, C Hill, K Kim, B Murray, B Pick, M Seligmann, I Weller.

**National Institute of Allergy and Infectious Disease:** K Cahill, L Fox, M Luzar, A Martinez, L McNay, J Pierson, J Tierney, S Vogel.

**International Drug Distribution (CTS Inc., Durham, North Carolina):** V Costas, J Eckstrand.

**Specimen Repository (SAIC Frederick, Inc.):** S Brown.

**Clinical Sites for ESPRIT and/or SILCAAT: Argentina:** L Abusamra, E Angel, S Aquilia, W Belloso, J Benetucci, V Bittar, E Bogdanowicz, P Cahn, A Casiro, J Contarelli, J Corral, L Daciuk, D David, W Dobrzanski, A Duran, J Ebenrstejin, I Ferrari, D Fridman, V Galache, G Guaragna, S Ivalo, A Krolewiecki, I Lanusse, H Laplume, M Lasala, R Lattes, J Lazovski, G Lopardo, M Losso, L Lourtau, S Lupo, A Maranzana, C Marson, L Massera, G Moscatello, S Olivia, I Otegui, L Palacios, A Parlante, H Salomon, M Sanchez, C Somenzini, C Suarez, M Tocci, J Toibaro, C Zala. **Australia:** S Agrawal, P Ambrose, C Anderson, J Anderson, D Baker, K Beileiter, K Blavius, M Bloch, M Boyle, D Bradford, P Britton, P Brown, T Busic, A Cain, L Carrall, S Carson, I Chenoweth, J Chuah, F Clark, J Clemons, K Clezy, D Cooper, P Cortissos, N Cunningham, M Curry, L Daly, C D'Arcy-Evans, R Del Rosario, S Dinning, P Dobson, W Donohue, N Doong, C Downs, E Edwards, S Edwards, C Egan, W Ferguson, R Finlayson, C Forsdyke, L Foy, T Franic, A Frater, M French, D Gleeson, J Gold, P Habel, K Haig, S

Hardy, R Holland, J Hoy, J Hudson, R Hutchison, N Hyland, R James, C Johnston, M Kelly, M King, K Kunkel, H Lau, J Leamy, D Lester, J Leung, A Lohmeyer, K Lowe, K MacRae, C Magness, O Martinez, H Maruszak, N Medland, S Miller, J Murray, P Negus, R Newman, M Ngieng, C Nowlan, J Oddy, N Orford, D Orth, J Patching, M Plummer, S Price, R Primrose, I Prone, H Ree, C Remington, R Richardson, S Robinson, G Rogers, J Roney, N Roth, D Russell, S Ryan, J Sarangapany, T Schmidt, K Schneider, C Shields, C Silberberg, D Shaw, J Skett, D Smith, T Meng Soo, D Sowden, A Street, B Kiem Tee, JI Thomson, S Topaz, R Vale, C Villella, A Walker, A Watson, N Wendt, L Williams, D Youds. **Austria:** A Aichelburg, P Cichon, B Gemeinhart, A Rieger, B Schmied, V Touzeau-Romer, N Vetter. **Belgium:** R Colebunders, N Clumeck, A DeRoo, K Kabeya, E O'Doherty, S de Wit. **Brazil:** C De Salles Amorim, C Basso, S Flint, E Kallas, G Levi, D Lewi, L Pereira Jr, M da Silva, T Souza, A Toscano. **Canada (CTN):** J Angel, M Arsenault, M Bast, B Beckthold, P Bouchard, I Chabot, R Clarke, J Cohen, P Coté, M Ellis, C Gagne, J Gill, M Houde, B Johnston, N Jubinville, C Kato, N Lamoureux, G Larson, J Latendre-Paquette, A Lindemulder, A McNeil, N McFarland, J Montaner, C Morrisseau, R O'Neill, G Page, A Piche, B Pongracz, H Preziosi, L Puri, A Rachlis, E Ralph, I Raymond, D Rouleau, JP Routy, R Sandre, T Seddon, S Shafran, C Sikora, F Smaill, D Stromberg, S Trottier, S Walmsley, K Weiss, K Williams, D Zarowny. **Denmark:** B Baadegaard, Å Bengaard Andersen, K Boedker, P Collins, J Gerstoff, L Jensen, H Moller, P Lehm Andersen, I Loftheim, L Mathiesen, H Nielsen, N Obel, C Pedersen, D Petersen, L Pors Jensen, F Trunk Black. **France (ANRS):** JP Aboulker, A Aouba, M Bensalem, H Berthe, C Blanc, M Bloch, D Bornarel, O Bouchaud, F Boue, E Bouvet, C Brancon, S Breaud, D Brosseau, A Brunet, C Capitant, C Ceppi, C Chakvetadze, C Cheneau, JM Chenebault, P De Truchis, AM Delavalle, JF Delfraissy, P Dellamonica, AM Delavalle, C Dumont, N Edeb, G Fabre, S Ferrando, A Foltzer, V Foubert, JA Gastaut, J Gerbe, PM Girard, C Goujard, B Hoen, P Honore, H Hue, T Hynh, C Jung, S Kahi, C Katlama, JM Lang, V Le Baut, B Lefebvre, N Leturque, Y Lévy, J Loison, G Maddi, A Maignan, C Majerholc, C de Boever, JL Meynard, C Michelet, C Michon, M Mole, E Netzer, G Pialoux, I Poizot-Martin, F Raffi, M Ratajczak, I Ravaux, J Reynes, D Salmon-Ceron, M Sebire, A Simon, L Tegna, D Tisne-Dessus, C Tramoni, JP Viard, M Vidal, C Viet-Peaucelle, L Weiss, A Zeng, D Zucman. **Germany:** A Adam, K Arastéh, G Behrens, F Bergmann, M Bickel, D Bittner, J Bogner, N Brockmeyer, N Darrelmann, M Deja, M Doerler, S Esser, G Faetkenheuer, S Fenske, S Gajetzki, D Gey, F Goebel, D Gorriahn, E Harrer, T Harrer, H Hartl, M Hartmann, S Heesch, W Jakob, H Jäger, H Klinker, G Kremer, C Ludwig, K Mantzsch, S Mauss, A Meurer, A Niedermeier, N Pittack, A Plettenberg, A Potthoff, M Probst, M Rittweger, J Rockstroh, B Ross, J Rotty, E Rund, T Ruzicka, Rt Schmidt, G Schmutz, E Schnaitmann, D Schuster, T Sehr, B Spaeth, S Staszewski, HJ Stellbrink, C Stephan, T Stockey, A Stoehr, K Tillmann, A Trein, T Vaeth, M Vogel, J Wasmuth, C Wengenroth, R Winzer, E Wolf. **Ireland:** F Mulcahy, DI Reidy. **Israel:** Y Cohen, G Drora, I Eliezer, O Godo, E Kedem, E Magen, M Mamorsky, S Pollack, Z Sthoeger, H Vered, I Yust. **Italy:** F Aiuti, M Bechi, A Bergamasco, D Bertelli, R Bruno, L Butini, M Cagliuso,

G Carosi, S Casari, V Chrysoula, G Cologni, V Conti, A Costantini, A Corpolongo, G D'Offizi, F Gaiottino, M Di Pietro, R Esposito, G Filice, M Francesco, E Gianelli, C Graziella, L Magenta, F Martellotta, R Maserati, F Mazzotta, G Murdaca, G Nardini, S Nozza, F Puppo, M Pogliaghi, D Ripamonti, C Ronchetti, S Rusconi, V Rusconi, P Sacchi, N Silvia, F Suter, G Tambussi, A Uglietti, M Vechi, B Vergani, F Vichi, P Vitiello. **Japan:** A Iwamoto, Y Kikuchi, N Miyazaki, M Mori, T Nakamura, T Odawara, S Oka, T Shirasaka, M Tabata, M Takano, C Ueta, D Watanabe, Y Yamamoto. **Morocco:** I Erradey, H Himmich, K Marhoum El Filali. **The Netherlands:** W Blok, R van Boxtel, K Brinkman H Doevelaar, A van Eeden, M Grijzen, M Groot, J Juttman, M Kuipers, S Ligthart, P van der Meulen, J Lange, N Langebeek, S Ligthart, P Reiss, C Richter, M Schoemaker, L Schrijnders-Gudde, E Septer-Bijleveld, H Sprenger, J Vermeulen, R ten Kate, B van de Ven. **Norway:** J Bruun, D Kvale, A Maeland. **Poland:** E Bakowska, M Beniowski, A Boron-Kaczmarzka, J Gasiorowski, A Horban, M Ingot, B Knysz, E Mularska, M Parczewski, M Pynka, W Rymer, A Szymczak. **Portugal:** M Aldir, F Antunes, C Baptista, J da Conceicao Vera, M Doroana, K Mansinho, C Raquel A dos Santos, E Valadas, I Vaz Pinto. **Singapore:** E Chia, E Foo, F Karim, PL Lim, A Panchalingam, N Paton, A Quek. **Spain:** R Alcázar-Caballero, E Aragon, J Arnaiz, J Arribas, J Arrizabalaga, X de Barron, F Blanco, E Bouza, I Bravo, S Calvo, L Carbonero, I Carpena, M Castro, B Clotet, L Cortes, M del Toro, P Domingo, M Elias, J Espinosa, V Estrada, E Fernandez-Cruz, P Fernández, H Freud, M Fuster, A Garcia, G Garcia, R Garrido, J Gatell, P Gijón, J Gonzalez-García, I Gil, A González, J González-Lahoz, P López Grosso, M Gutierrez, E Guzmán, J Iribarren, M Jiménez, A Jou, J Juega, J Lopez, P Lopez, F Lozano, L Martín-Carbonero, R Mata, G Mateo, A Menasalvas, C Mirelles, J de Miguel Prieto, M Montes, A Moreno, J Moreno, V Moreno, R Muñoz, A Ocampo, E Ortega, L Ortiz, B Padilla, A Parras, A Paster, J Pedreira, J Peña, R Perea, B Portas, J Puig, F Pulido, M Rebollar, J de Rivera, V Roca, F Rodríguez- Arrondo, R Rubio, J Santos, J Sanz, G Sebastian, M Segovia, V Soriano, L Tamargo, S Varea, P Viciano, M von Wichmann. **Sweden:** G Bratt, A Hollander, P Olov Pehrson, I Petz, E Sandstrom, A Sönnernborg. **Switzerland:** E Bernasconi, V Gurtner. **Thailand:** U Ampunpong, C Auchiang, C Bowonwatanuwong, P Chanchai, P Chetchotisakd, T Chuenyan, C Duncombe, M Horsakulthai, P Kantipong, K Laohajinda, P Phanuphak, V Pongsurachet, S Pradapmook, K Ruxruntham, S Seekaew, A Sonjai, S Suwanagool, W Techasathit, S Ubolyam, J Wankoon. **United Kingdom:** I Alexander, D Dockrell, P Easterbrook, B Edwards, E Evans, M Fisher, R Fox, B Gazzard, G Gilleran, J Hand, L Heald, C Higgs, S Jebakumar, I Jendrulek, M Johnson, S Johnson, F Karim, G Kinghorn, K Kuldane, C Leen, R Maw, S McKernan, L McLean, S Morris, M Murphy, S O'Farrell, E Ong, B Peters, C Stroud, M Wansbrough-Jones, J Weber, D White, I Williams, M Wiselka, T Yee. **United States:** S Adams, D Allegra, L Andrews, B Aneja, G Anstead, R Arduino, R Artz, J Bailowitz, S Banks, J Baxter, J Baum, D Benator, D Black, D Boh, T Bonam, M Brito, J Brockelman, S Brown, V Bruzzese, A Burnside Jr., V Cafaro, K Casey, L Cason, G Childress, Cl Clark, D Clifford, M Climo, D Cohn, P Couey, H Cuervo, R Davey Jr, S Deeks, M Dennis, M Diaz-Linares, D Dickerson, M Diez, J Di Puppo, P Dodson, D Dupre, R Elion,



K Elliott, W El-Sadr, M Estes, J Fabre, M Farrough, J Flamm, S Follansbee, C Foster, C Frank, J Franz, G Frechette, G Freidland, J Frische, L Fuentes, C Funk, C Geisler, K Genter, M Giles, M Goetz, M Gonzalez, C Graeber, F Graziano, D Grice, B Hahn, C Hamilton, S Hassler, A Henson, S Hopper, M John, L Johnson, M Johnson, R Johnson, R Jones, J Kahn, M Kelly, N Klimas, M Kolber, S Koletar, A Labriola, R Larsen, F Lasseter, M Lederman, T Ling, T Lusch, R MacArthur, C Machado, L Makohon, J Mandelke, S Mannheimer, N Markowitz, M Martínez, N Martinez, M Mass, H Masur, D McGregor, D McIntyre, J McKee, D McMullen, M Mettinger, S Middleton, J Mieras, D Mildvan, P Miller, T Miller, V Mitchell, R Mitsuyasu, A Moanna, C Mogridge, F Moran, R Murphy, D Mushatt, R Nahass, D Nixon, S O'Brien, J Ojeda, P Okhuysen, M Olson, J Osterberger, W Owen, Sr. S Pablovich, S Patel, G Perez, G Pierone Jr., R Poblete, A Potter, E Preston, C Rappoport, N Regevik, M Reyelt, F. Rhame, L Riney, M Rodriguez-Barradas, M Rodriguez, Milagros Rodriguez, J Rodriguez, R Roland, C Rosmarin-DeStefano, W Rossen, J Rouff, M Saag, J Sampson, S Santiago, J Sarria, S Wirtz, U Schmidt, C Scott, A Sheridan, A Shin, S Shrader, G Simon, D Slowinski, K Smith, J Spotkov, C Sprague, D States, C Suh, J Sullivan, K Summers, B Sweeton, V Tan, T Tanner, E Tedaldi, Z Temesgen, D Thomas, M Thompson, C Tobin, N Toro, W Towner, K Upton, J Uy, S Valenti, C van der Horst, J Vita, J Voell, J Walker, T Walton, K Wason, V Watson, A Wellons, J Weise, M White, T Whitman, B Williams, N Williams, J Windham, M Witt, K Workowski, G Wortmann, T Wright, C Zelasky, B Zwickl.
